# Supplementary material for: Hypothalamic and Cell-Specific Transcriptomes Unravel a Dynamic Neuropil Remodeling in Leptin-Induced and Typical Pubertal Transition in Female Mice
Source: PubMed Central journal article supplement — iScience. 2020 Sep 16;23(10):101563. doi: 10.1016/j.isci.2020.101563 (PMC7522126; doi:10.1016/j.isci.2020.101563), 2020-09-16
Supplement: mmc1.pdf [file mmc1.pdf]

iScience, Volume 23

## **Supplemental Information**

### **Hypothalamic and Cell-Specific Transcriptomes**

### **Unravel a Dynamic Neuropil Remodeling in Leptin-Induced and Typical Pubertal Transition in Female Mice**

**Xingfa Han, Laura L. Burger, David Garcia-Galiano, Seokmin Sim, Susan J. Allen, David P. Olson, Martin G. Myers Jr., and Carol F. Elias**

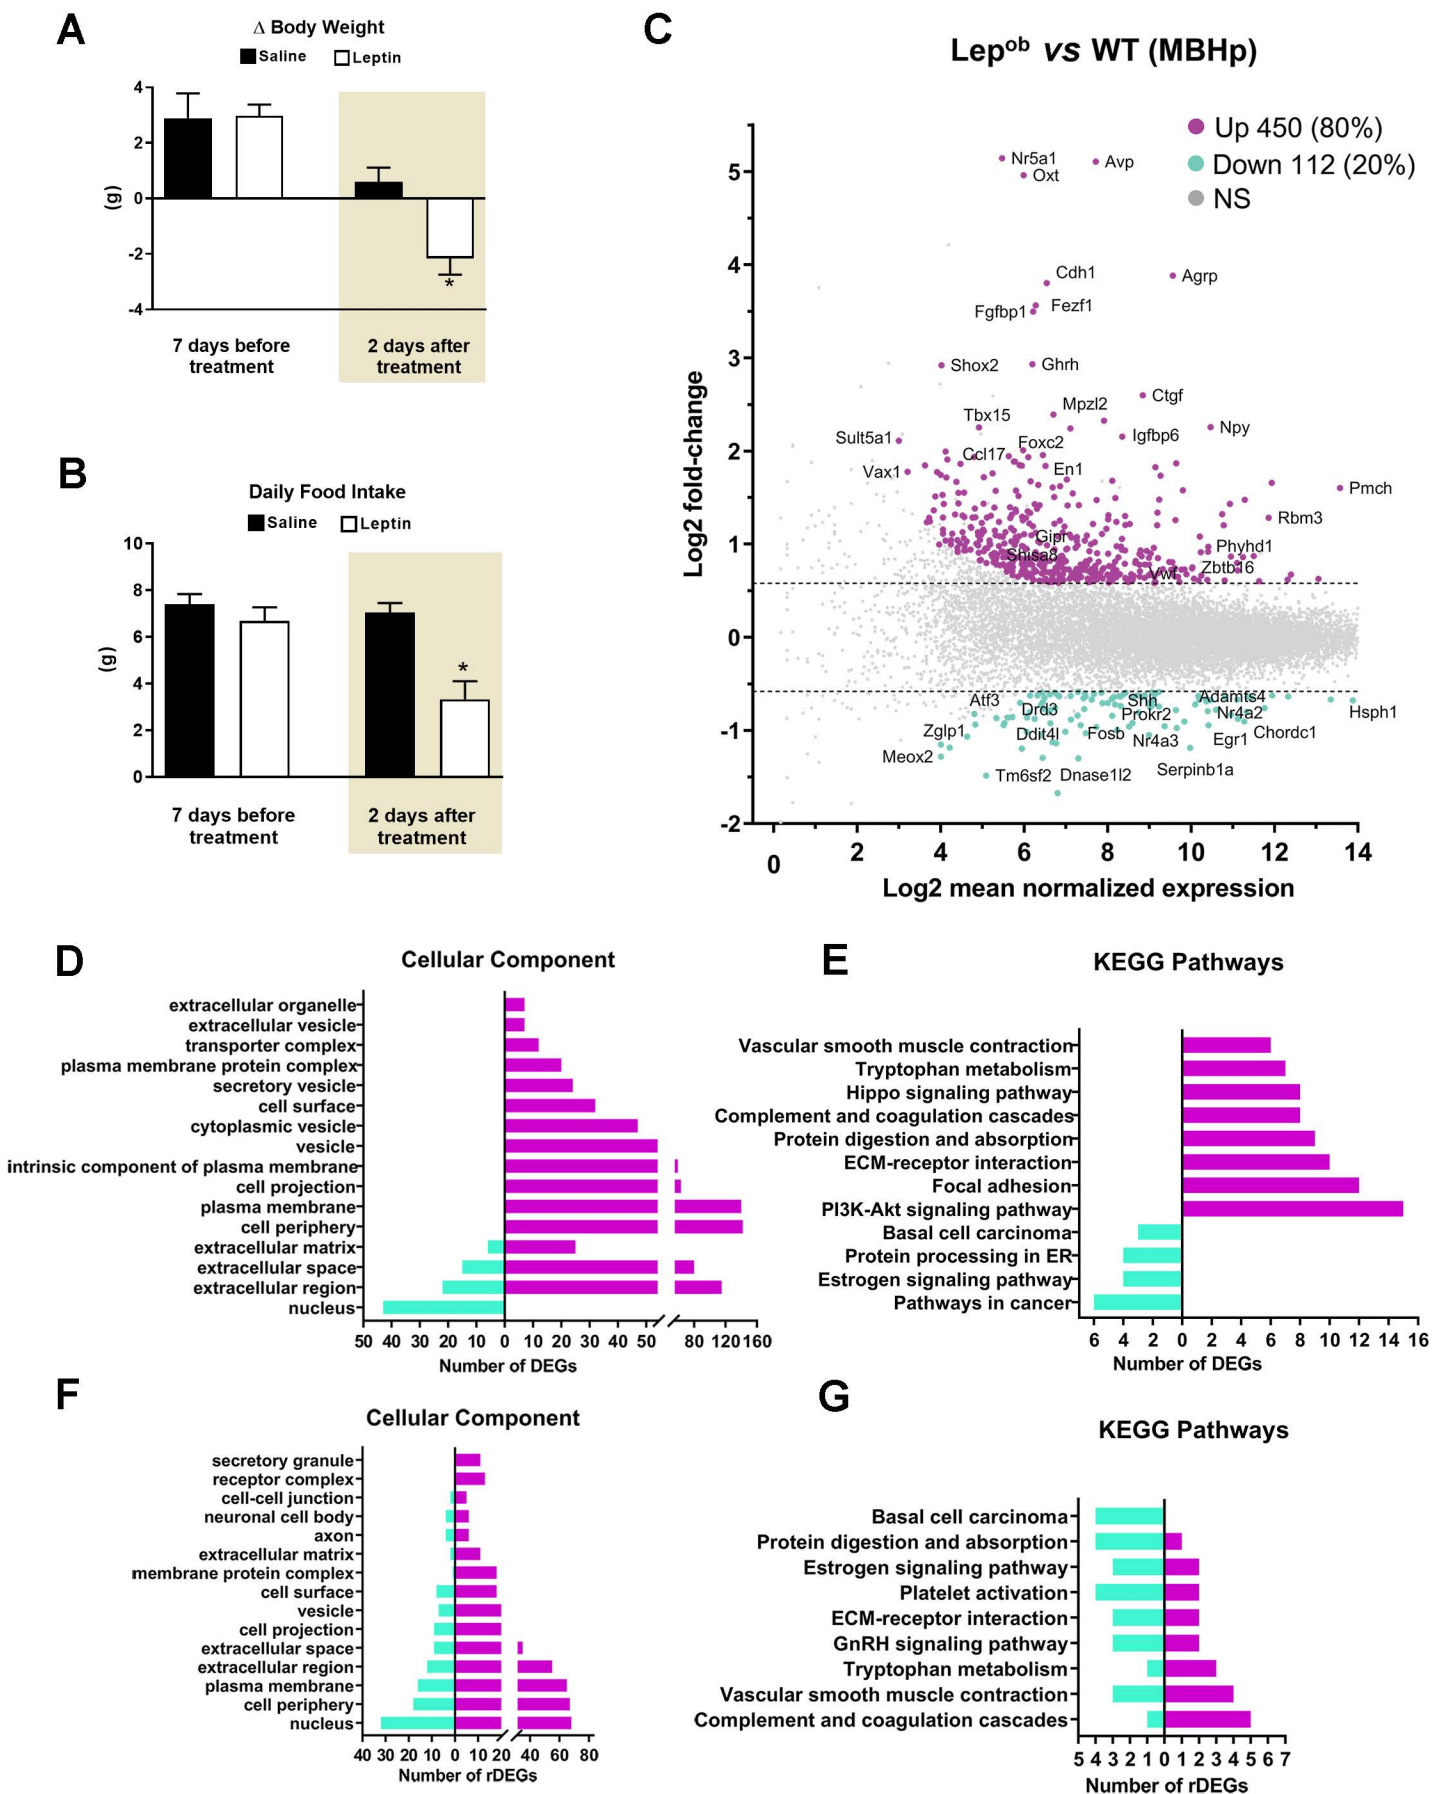

**Figure S1. Related to Figure 1.** (A-B) Changes in body weight and food intake of leptin-deficient *Lep<sup>ob</sup>* mice before and after treatment with saline or leptin. Mice with clear vaginal opening were euthanized. (C) Differentially expressed genes (DEGs) in the posterior mediobasal hypothalamus (MBHp) between *Lep<sup>ob</sup>* and WT female mice. GO (example of cellular compartment) and KEGG pathways of DEGs (D-E) and rDEGs (F-G) in the MBHp comparing *Lep<sup>ob</sup>* vs WT (D-E) and *Lep<sup>ob</sup>* vs *Lep<sup>ob</sup>* + leptin (F-G). Purple, upregulated; Green, downregulated; NS, non significant. \* $p < 0.05$  by Student *t* test. Data presented as mean  $\pm$  SEM.

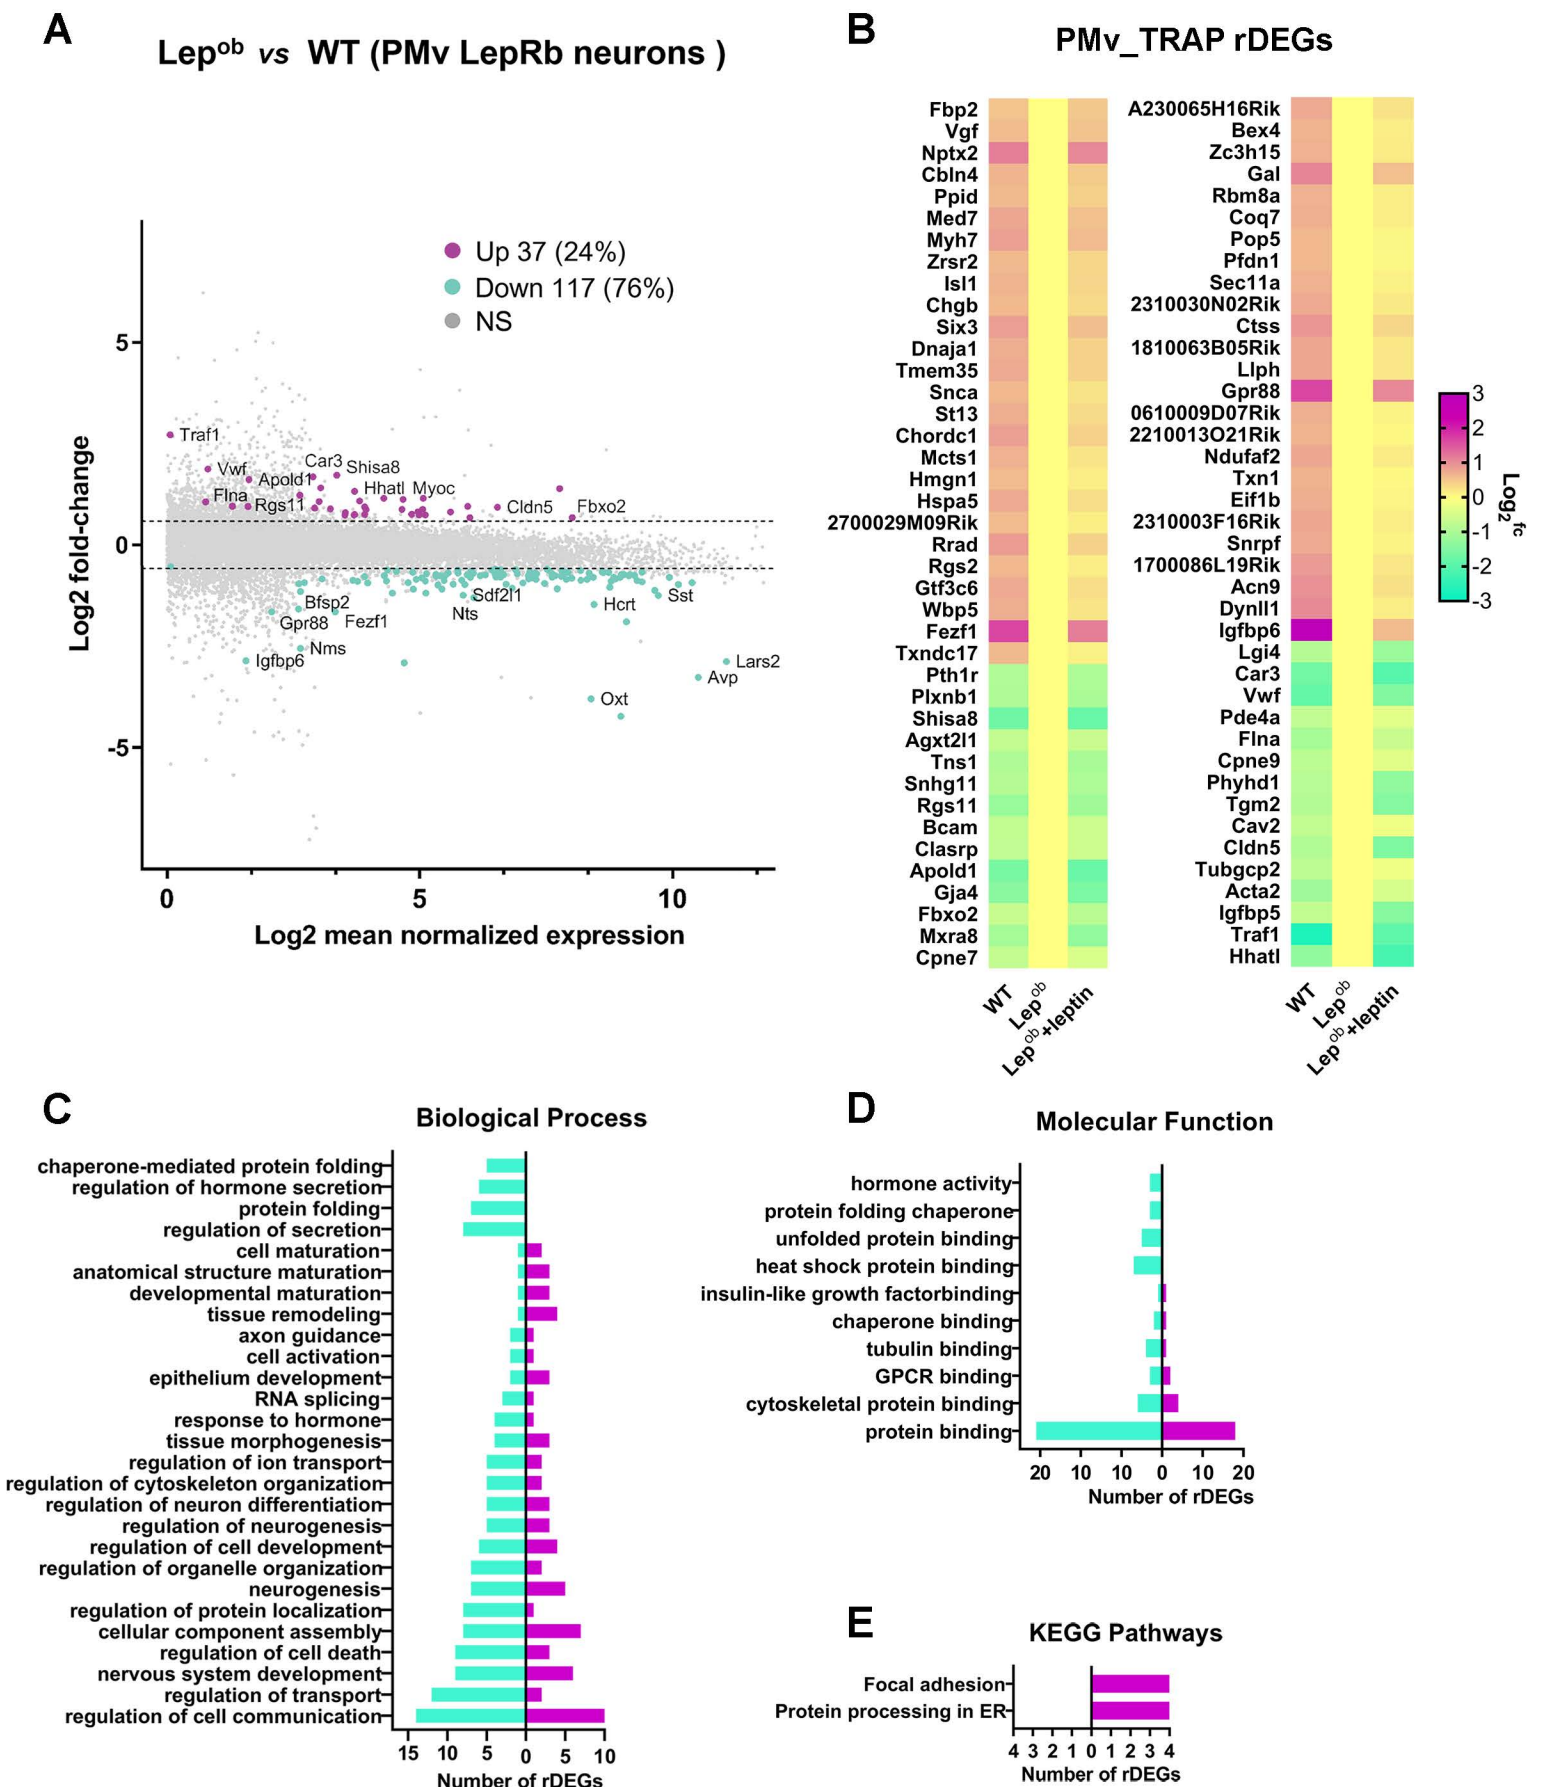

**Figure S2. Related to Figure 2.** Differentially expressed genes (TRAP\_DEGs) in LepRb PMv neurons comparing Lep<sup>ob</sup> and WT mice. (A) Most of the DEGs were downregulated in Lep<sup>ob</sup> females. (B) recovered DEGs (rDEGs) enriched in PMv LepRb neurons. (C-E) GO and KEGG pathways associated with rDEGs. Purple, upregulated; Green, downregulated; NS, non-significant.

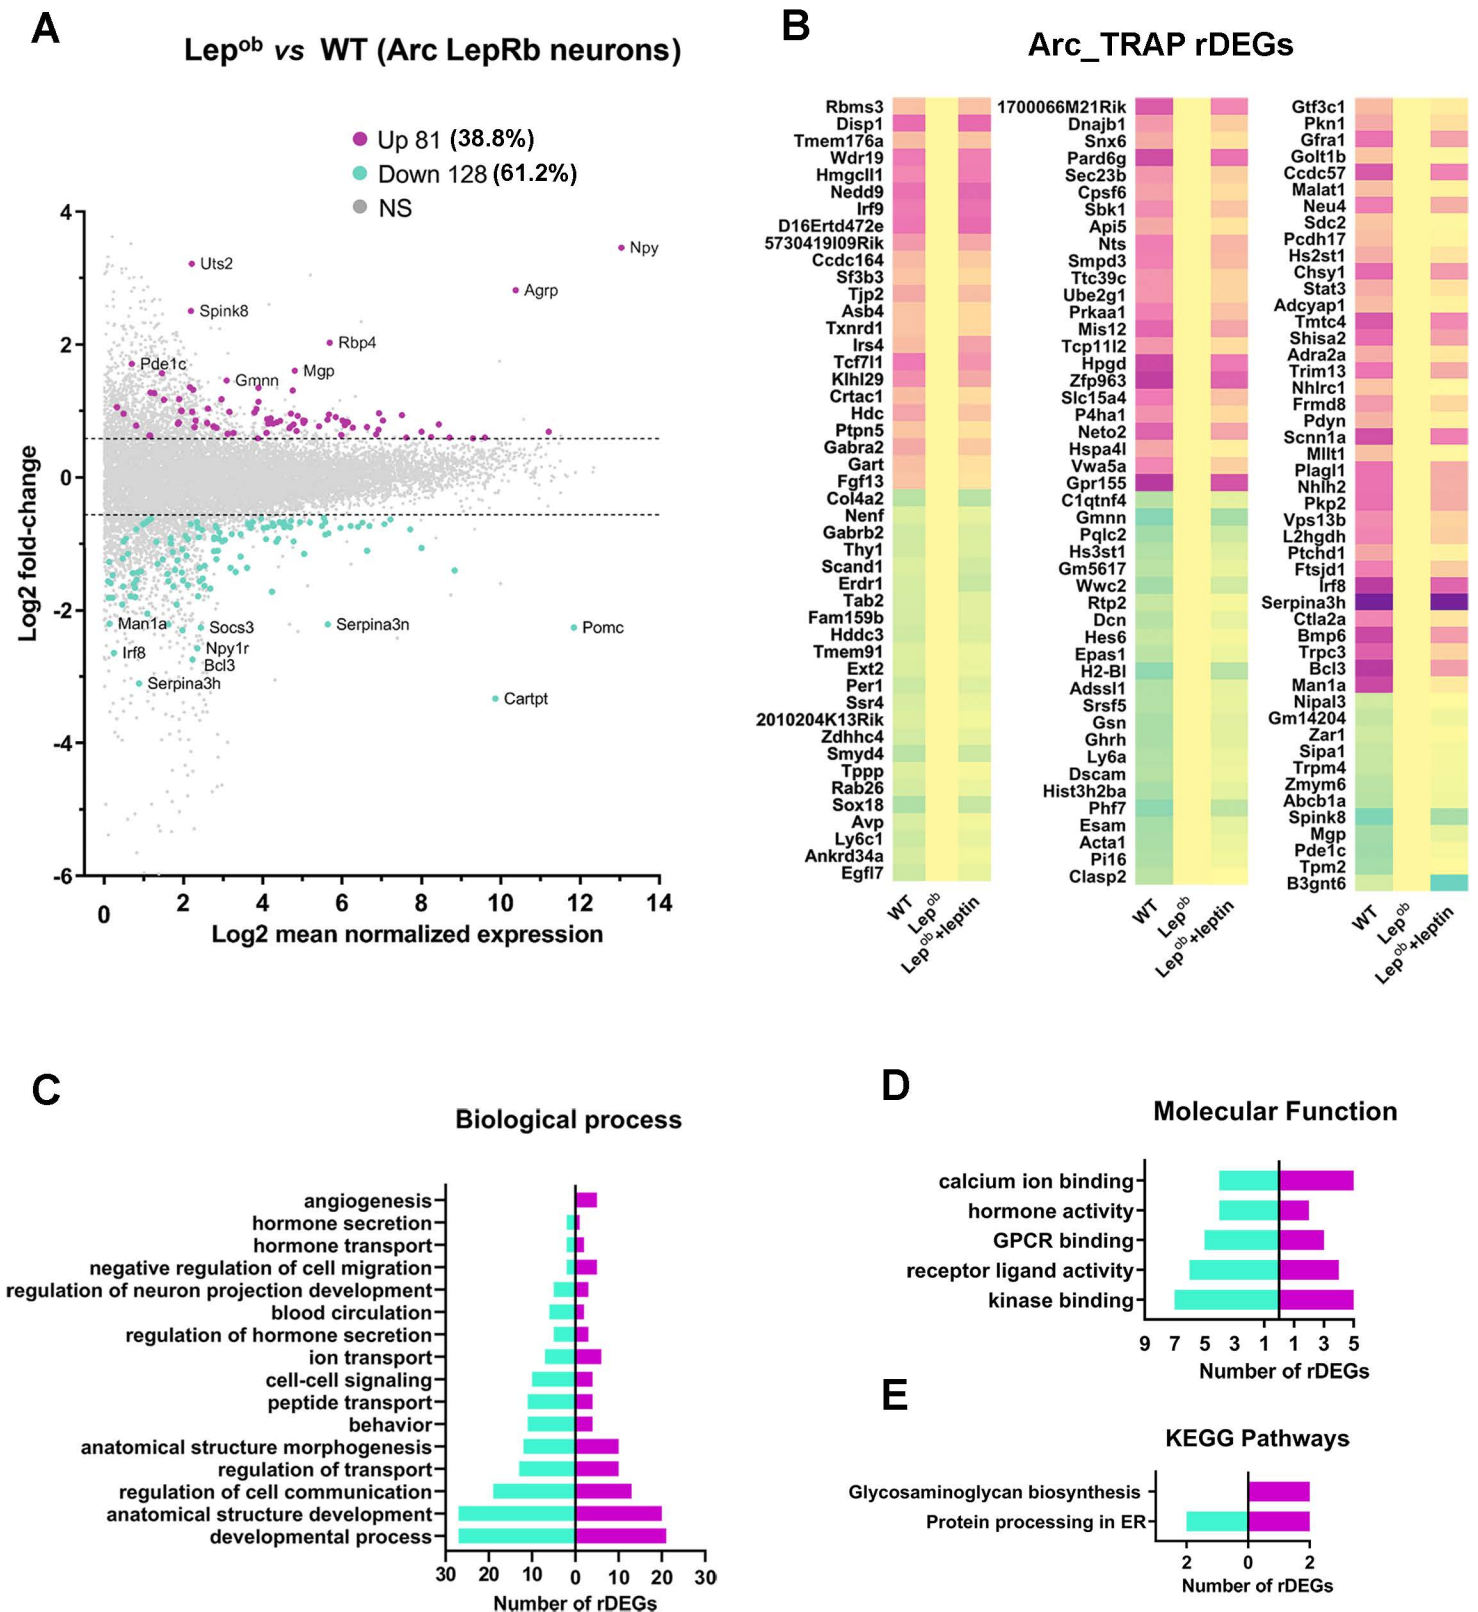

**Figure S3. Related to Figure 2.** Differentially expressed TRAP genes (TRAP\_DEGs) in LepRb Arc neurons comparing Lep<sup>ob</sup> and WT. (A) Most of these TRAP DEGs were downregulated in Lep<sup>ob</sup> females. (B) recovered DEGs (rDEGs) after short-term leptin treatment. (C-E) GO and KEGG pathways associated with rDEGs. Purple, upregulated; Green, downregulated; NS, non significant.





PMv

**A Biological Process**

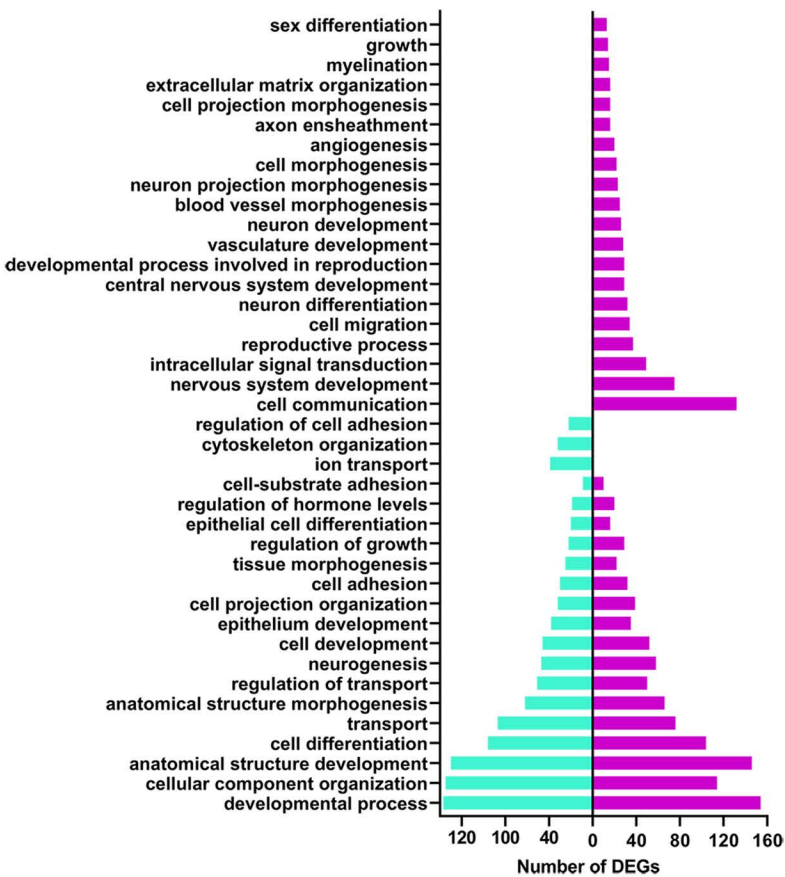

**B Cellular Component**

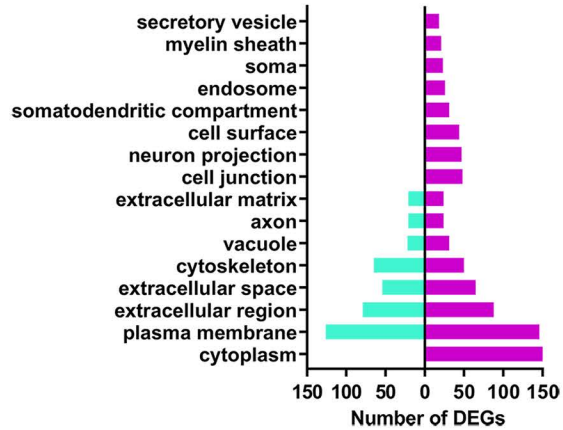

**C Molecular Function**

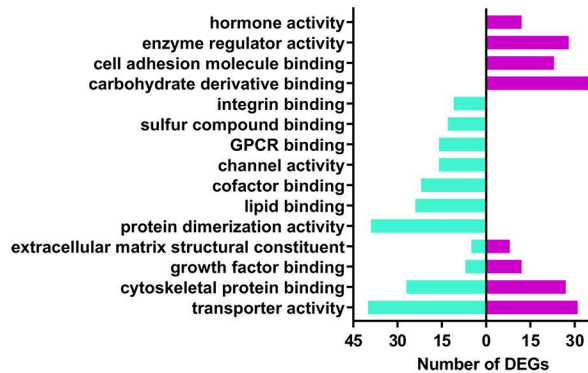

Arc

**D Biological Process**

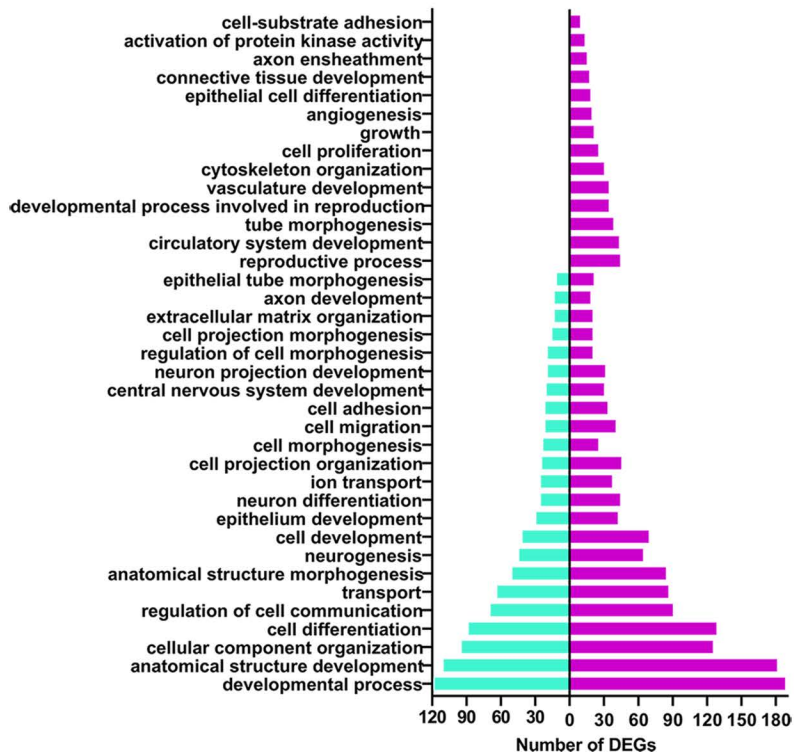

**E Cellular Component**

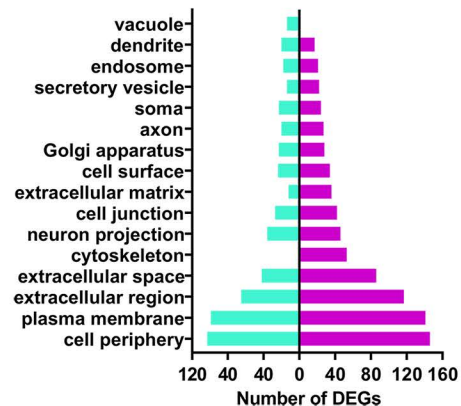

**F Molecular Function**

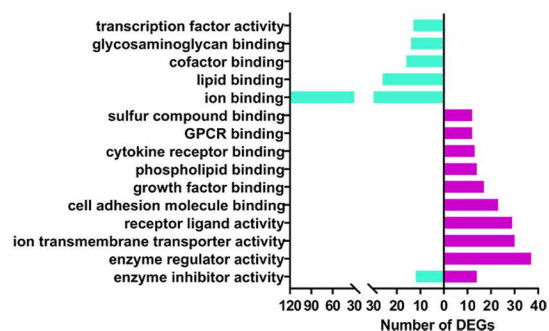

**Figure S5. Related to Figure 3.** Categorization of differentially expressed genes (DEGs) in the ventral premammillary nucleus (PMv, A-C) and arcuate nucleus (Arc, D-F) of prepubertal vs diestrous females.

**Table S5:** Primers used in qPCR.

| <b>Genes</b>  | <b>Primer sequence (5'-3')</b>                                | <b>Product length (bp)</b> |
|---------------|---------------------------------------------------------------|----------------------------|
| <i>18s</i>    | F: TGACTCAACACGGGAAACC<br>R: AACCCAGACAAATCGCTCCAC            | 125                        |
| <i>Ccl17</i>  | F: GCTGGTATAAGACCTCAGTGGAGTGT<br>R: CAATCTGATGGCCTTCTTCACA    | 116                        |
| <i>Cd46</i>   | F: ATGCCTGTGAACTACCACGGCCATTTGAAG<br>R: TTTGCCAAATGAAGGGTCTTG | 230                        |
| <i>Crh</i>    | F: TCTGCAGAGGCAGCAGTGCGGG<br>R: CGGATCCCCTGCTGAGCAGGGC        | 150                        |
| <i>Gipr</i>   | F: CTGCCTGCCGCACGGCCCAGAT<br>R: GCGAGCCAGCCTCAGCCGGTAA        | 383                        |
| <i>Lhx9</i>   | F: CGTCTCTACGCTTCTGCATC<br>R: GGCGGAAAGGACACGAAT              | 135                        |
| <i>Meox2</i>  | F: TGGCAGCAAAAGGAAAAGCG<br>R: GGAACCACACTTTCACCTGTCT          | 218                        |
| <i>Nanos2</i> | F: ATTCAGAGCCGGAAGCAAAG<br>R: GACTGCTGTTGAGTGGACAA            | 285                        |
| <i>Nr4a2</i>  | F: TTCCACCAGAACTACGTGGC<br>R: CAGCTAGACACAGGAGTGCC            | 116                        |
| <i>Pdlim3</i> | F: TTGACAGGGCAGAACTCGC<br>R: GAAGCGCTCACTACCTGTCT             | 187                        |
| <i>Pla2g3</i> | F: GGGA ACTCTGCTGAAAATGC<br>R: AATGGTTTGTGGGCACTGAT           | 90                         |
| <i>Rbp4</i>   | F: GACAAGGCTCGTTTCTCTGG<br>R: AAAGGAGGCTACACCCAGT             | 243                        |
| <i>Shh</i>    | F: AGCAGACCGGCTGATGACTC<br>R: TCACTCCAGGCCACTGGTTC            | 83                         |
| <i>Shox2</i>  | F: TGGAACA ACTCAACGAGCTGGAGA<br>R: TTCAA ACTGGCTAGCGGCTCCTAT  | 200                        |
| <i>Wnt7a</i>  | F: GGCTACAACACACACCAGTAT<br>R: GATCTGACCTGTGACCTCATTC         | 137                        |
| <i>Zbtb16</i> | F: CCTGGACAGTTTGGCACTGA<br>R: TCCGTGCCAGTATGGGTCT             | 138                        |
| <i>Zglp1</i>  | F: GGTTCAAGGGGGTAACTCTGG<br>R: AGCAA CTGGAACAACGGGTG          | 282                        |

Note: F, Forward primer; R, Reverse primer

## Transparent Methods

### Key Resources Table

| REAGENT or RESOURCE                                                                         | SOURCE                                                                   | IDENTIFIER       |
|---------------------------------------------------------------------------------------------|--------------------------------------------------------------------------|------------------|
| Antibodies                                                                                  |                                                                          |                  |
| Sheep anti-VWF antibody                                                                     | Abcam Cat#ab11713                                                        | RRID:AB_298501   |
| Rabbit anti-Laminin antibody                                                                | Novus Cat#NB300-144                                                      | RRID:AB_10001146 |
| Rabbit anti-CART antibody                                                                   | Phoenix Cat#H-003-62                                                     | RRID:AB_2313614  |
| Goat anti-Rabbit IgG (H+L) Highly Cross-Adsorbed Secondary Antibody, Alexa Fluor Plus 488   | Invitrogen Cat#A32731                                                    | RRID:AB_2633280  |
| Donkey anti-Rabbit IgG (H+L) Highly Cross-Adsorbed Secondary Antibody, Alexa Fluor Plus 488 | Invitrogen Cat#A32790                                                    | RRID:AB_2762833  |
| Donkey anti-Sheep IgG (H+L) Cross-Adsorbed Secondary Antibody, Alexa Fluor 594              | Invitrogen Cat#A-11016                                                   | RRID:AB_2534083  |
| Chemicals, Peptides, and Recombinant Proteins                                               |                                                                          |                  |
| Biotin-Protein L                                                                            | GeneScript                                                               | Cat#M00097       |
| BSA                                                                                         | Jackson Immuno Research                                                  | Cat#0001-000-162 |
| Cycloheximide (CHX)                                                                         | Sigma                                                                    | Cat#C7698        |
| Dithiothreitol Molecular Biology Reagent                                                    | Sigma                                                                    | Cat#D9779        |
| D-(+)-Glucose Bioextra                                                                      | Sigma                                                                    | Cat#G7528        |
| DHPC                                                                                        | Avanti Polar Lipids/VWR                                                  | Cat#100122-252   |
| EDTA Free, Protease Cocktail Tablets                                                        | Roche                                                                    | Cat#11836170001  |
| GFP Ab, C8                                                                                  | Memorial-Sloan Kettering Monoclonal Antibody Facility                    | Cat#HTZ-GFP-19C8 |
| GFP Ab, F7                                                                                  | Memorial-Sloan Kettering Monoclonal Antibody Facility                    | Cat#HTZ-GFP-19F7 |
| HBSS, Hank'S balanced salt solution, 10X                                                    | Invitrogen/Life Technologies                                             | Cat#14065-056    |
| HEPES, 1M                                                                                   | Affymetrix/Fisher                                                        | Cat#16924        |
| iTaq™ Universal SYBR® Green Supermix                                                        | BIO-RAD                                                                  | Cat#1725120      |
| KCl, 2M                                                                                     | Applied Biosystems/Life Technologies                                     | Cat#AM9640G      |
| Leptin                                                                                      | A.F. Parlow, NHPP, Harbor-UCLA Medical Center, Torrance, California, USA | N/A              |
| Methanol, Anhydrous, 99.8%                                                                  | Sigma                                                                    | Cat#322415       |
| MgCl <sub>2</sub> , 1M                                                                      | Applied Biosystems/Life Tech                                             | Cat#AM9530G      |



|                                                   |                              |                                                                                                                           |
|---------------------------------------------------|------------------------------|---------------------------------------------------------------------------------------------------------------------------|
| NP-40, 10% Sterile, Rnase Free Vials              | AG Scientific                | Cat#P1505                                                                                                                 |
| PBS, 10X                                          | Applied Biosystems/Life Tech | Cat#AM9625                                                                                                                |
| QIAzol Lysis Reagent                              | Qiagen                       | Cat#79306                                                                                                                 |
| RNAasin                                           | Promega/Fisher               | Cat#N2515                                                                                                                 |
| RNase Free Water                                  | Applied Biosystems/Life Tech | Cat#AM9937                                                                                                                |
| Roche Protector Rnase Inhibitor                   | Roche/Sigma                  | Cat#3335402001                                                                                                            |
| Sodium Azide, 99.5%                               | Sigma                        | Cat#S2002                                                                                                                 |
| Sodium Bicarbonate Bioextra                       | Sigma                        | Cat#S6297                                                                                                                 |
| Steptavidin T1 Dynabeads                          | Invitrogen/Life Technologies | Cat#65601                                                                                                                 |
| Superasin                                         | Applied Biosystems/Life Tech | Cat#AM2694                                                                                                                |
| <b>Critical Commercial Assays</b>                 |                              |                                                                                                                           |
| DNase I                                           | Sigma-Aldrich                | Cat#AMPD1                                                                                                                 |
| miRNeasy@mini Kit                                 | Qiagen                       | Cat# 217004                                                                                                               |
| Illumina TruSeq mRNA Sample Preparation v2 kit    | Illumina                     | Catalog #s RS-122-2001, RS-122-2002                                                                                       |
| KAPA Library Quantification Kits                  | Kapa Biosystems              | Cat# KK4835                                                                                                               |
| RNeasy Micro Kit                                  | Qiagen                       | Cat#74004                                                                                                                 |
| SMARTer Ultra Low RNA Kit for Illumina Sequencing | Clontech                     | Cat#634936                                                                                                                |
| SuperScript™ II                                   | Invitrogen                   | Cat#18064022                                                                                                              |
| <b>Deposited Data</b>                             |                              |                                                                                                                           |
| Sequencing data listed in the Tables              | This paper                   | Table S1-4                                                                                                                |
| <b>Experimental Models: Organisms/Strains</b>     |                              |                                                                                                                           |
| C57BL/6J mice                                     | Jackson labs                 | Stock # 000664                                                                                                            |
| Lep <sup>ob/+</sup> mice                          | Jackson labs                 | Stock # 000632                                                                                                            |
| LepR <sup>cre</sup> mice                          | Leshan et al., 2006          | N/A                                                                                                                       |
| Rosa <sup>eGFP-L10a/eGFP-L10a</sup> mice          | Krashes et al., 2014         | N/A                                                                                                                       |
| <b>Oligonucleotides</b>                           |                              |                                                                                                                           |
| Primers for qPCR quantification                   | This paper                   | See Table S5                                                                                                              |
| <b>Software and Algorithms</b>                    |                              |                                                                                                                           |
| CiiiDER                                           | Gearing et al., 2019         | <a href="http://ciiider.com/">http://ciiider.com/</a>                                                                     |
| Cytoscape(v3.7.2)                                 | Cytoscape Software           | <a href="http://www.cytoscape.org/">http://www.cytoscape.org/</a>                                                         |
| Cufflinks/Cuffdiff(2.1.1)                         | Trapnell et al., 2012        | <a href="http://cole-trapnell-lab.github.io/cufflinks/install/">http://cole-trapnell-lab.github.io/cufflinks/install/</a> |
| DAVID(v6.8)                                       | Huang da et al., 2009        | <a href="https://david.ncifcrf.gov/">https://david.ncifcrf.gov/</a>                                                       |
| GraphPad Prism (v8.0)                             | GraphPad Software            | <a href="https://www.graphpad.com/">https://www.graphpad.com/</a>                                                         |

|                  |                         |                                                                                                                 |
|------------------|-------------------------|-----------------------------------------------------------------------------------------------------------------|
| R (v 3.6.1)      | R Software              | <a href="https://www.R-project.org/">https://www.R-project.org/</a>                                             |
| STRING (v11.0)   | String Consortium       | <a href="https://string-db.org/cgi/input.pl">https://string-db.org/cgi/input.pl</a>                             |
| TopHat (v2.0.13) | Trapnell et al., 2012   | <a href="http://ccb.jhu.edu/software/tophat/downloads/">http://ccb.jhu.edu/software/tophat/downloads/</a>       |
| VLAD (v1.8.0)    | Richardson & Bult, 2015 | <a href="http://proto.informatics.jax.org/protocols/vlad/">http://proto.informatics.jax.org/protocols/vlad/</a> |

## Experimental Model and Subject Details

### Mice

Lep<sup>ob/+</sup> mouse (ob/+; JAX<sup>®</sup> mice, stock # 000632) purchased from Jackson labs were intercrossed to generate Lep<sup>+/+</sup> (WT) and Lep<sup>ob/ob</sup> (Lep<sup>ob</sup>) female littermates. Lep<sup>ob/+</sup> mice were crossed to LepR<sup>cre</sup> (Leshan et al., 2006) to obtain Lep<sup>ob/+</sup>LepR<sup>cre</sup> mice, which were subsequently crossed to Rosa<sup>eGFP-L10a/eGFP-L10a</sup> mice (Allison et al., 2015; Krashes et al., 2014) to generate Lep<sup>ob/+</sup>LepRb<sup>cre</sup>Rosa<sup>eGFP-L10a</sup> (LepRbLepR<sup>eGFP-L10a</sup>) mice, which express GFP-labeled L10a ribosomal protein targeted to LepRb neurons. Lep<sup>ob/+</sup>LepRb<sup>cre</sup>Rosa<sup>eGFP-L10a</sup> mice were then intercrossed to generate Lep<sup>+/+</sup>; LepRb<sup>cre/cre</sup>Rosa<sup>eGFP-L10a/eGFP-L10a</sup> and Lep<sup>ob/ob</sup>LepRb<sup>cre/cre</sup>Rosa<sup>eGFP-L10a/eGFP-L10a</sup> (LepRb<sup>eGFP-L10a</sup>) female littermates. Adult (PND60-70) and prepubertal (PND18) C57BL/6J females were generated from the intercrossing of C57BL/6J mice (JAX<sup>®</sup> mice, stock # 000664). Mice were bred at the University of Michigan and maintained in a light- (12 h light/dark cycle) and temperature- (21 to 23°C) controlled environment with free access to water and food. Mice were fed with a phytoestrogen-reduced diet 2016 (16% protein/4% fat, Teklad 2916 irradiated global rodent diet, Envigo) to minimize the effect of exogenous estrogen in pubertal development. All procedures involving mice were approved by the University of Michigan IACUC in accordance with AAALAC and NIH guidelines (protocol # PRO08712).

### Methods

#### Leptin treatment and harvesting of MBHp

Mice (PND60-70) were divided into three groups (n=4/group): a) wildtype (WT) diestrous females treated with intraperitoneal (ip.) saline; b) leptin-deficient (Lep<sup>ob</sup>) females treated with ip. saline (ob); and c) Lep<sup>ob</sup> females treated with ip. leptin (Lep<sup>ob</sup>+leptin) 2.5 µg/g for 2 days, at 9:00 AM and 5:00 PM (leptin from A.F. Parlow, Harbor-UCLA Medical Center, National Hormone and Peptide Program). One hour after the last saline or leptin injection (at 10:00 AM), females were euthanized by decapitation following anesthesia (isoflurane) and brains were harvested. Frontal sections of the hypothalamus (1 mm-thick) were collected using a brain matrix (Ted Pella, Inc. cat# 15003). The MBHp was micro-dissected, processed for RNA extraction and submitted for RNAseq analysis.

## **Translating Ribosome Affinity Purification (TRAP) of PMv and Arc LepRb cells**

Diestrus LepR<sup>eGFP-L10a</sup> and Lep<sup>ob</sup>LepR<sup>eGFP-L10a</sup> female mice (PND60-70) were used. The expression of eGFP-L10a in LepRb neurons in the hypothalamus of the LepR<sup>eGFP-L10a</sup> mouse line has been verified and validated by our group (Allison et al., 2018; Allison et al., 2015). The experimental design and saline/leptin treatment were the same as detailed in the previous item ("Leptin treatment and harvesting of MBHp"). The PMv and Arc were collected separately from the left and right sides of each individual mouse brain by micro punches (1.25 mm diameter). The third ventricle was used as anatomical reference for the medial and dorsal borders of the hypothalamus and the fornix was used as the lateral limit of the medial hypothalamus. Preliminary experiments assessing RNA concentration determined the need to pool micro punches from both sides of three mice per treatment group. Each pooled set of PMv or Arc punches was considered a single biological replicate, and four biological replicates in each treatment group were used. The mRNA was isolated from eGFP-tagged ribosomes, as well as eGFP-depleted supernatant (Allison et al., 2015; Burger et al., 2018; Heiman et al., 2014). Tissue punches were immediately homogenized in ice-cold lysis buffer [20 mM HEPES-KOH, 150 mM KCl, and 10 mM MgCl<sub>2</sub> (Affymetrix/Thermo Fisher Scientific); 1× EDTA Free Protease Inhibitor and 1.25% volume-to-volume ratio (v/v) of RNase Inhibitor (Roche, Indianapolis, IN), 0.625% v/v RNasin (Promega, Madison, WI), 0.625% v/v Supersasin (Invitrogen/Thermo Fisher Scientific), 0.5 mM dithiothreitol and 0.1 mg/ml cycloheximide. Lysis buffer volume was adjusted for input amounts of PMv and Arc punches (100 µL of lysis buffer per punches). Anti-GFP (HtzGFP-19F7 and HtzGFP-19C8; Antibody and Bioresource Core Facility, Memorial Sloan Kettering Cancer Center, New York, NY)-coated streptavidin magnetic beads (Streptavidin T1 Dynabeads; Invitrogen/Thermo Fisher Scientific) were applied to the samples. Immunoprecipitation occurred overnight at 4°C. Polysome-RNA complexes bound to the anti-GFP-coated streptavidin magnetic beads (LepRb neuron specific) were separated from the supernatant by a magnet; RNA was isolated using the RNeasy Micro Kit with on-column DNase (Qiagen, Valencia, CA). The RNA samples were subjected to RNA quantification and quality evaluation using the RNA 6000 Pico Chip (Agilent Technologies) for RNAseq. Before generating cDNA libraries, LepRb-enhanced and LepRb-depleted RNAs were reverse transcribed (Allison et al., 2018; Allison et al., 2015; Burger et al., 2018) and amplified for *Lepr* and *Actb* ( $\beta$ -actin, reference gene) using Taqman qPCR to determine enrichment for *Lepr*. The *Lepr* expression levels were normalized to *Actb* (no difference between groups), and enrichment was calculated as relative expression in LepRb-enhanced RNA samples divided by the normalized relative expression in the LepRb-depleted samples. The LepRb-enhanced RNA of each sample was used to create cDNA libraries with the SMARTer v4 Ultra Low Kit and Low Input DNA library Pre Kits (Clontech) (Burger et al., 2018).

## **Tissue harvesting in prepubertal vs diestrus females**

C57BL/6J prepubertal (P18) and adult diestrus (P60-70) females (n=4 per group) were euthanized under isoflurane anesthesia. Vaginal cytology was monitored for approximately 7 days before tissue collection in adult females to determine estrous cycle stage. Only normally cycling females were used. After euthanasia, uterine weight was measured to confirm diestrus (< 100 mg). PMv and Arc micro punches were dissected and collected as detailed in the

previous section (“Translating Ribosome Affinity Purification (TRAP) of PMv and Arc LepRb cells”) and processed for RNAseq analysis.

### **RNA-sequencing and Data Processing**

RNA was extracted with miRNeasy<sup>®</sup>mini Kit (Qiagen, cat# 217004) according to the manufacturer protocol. RNA was assessed for quality using the TapeStation (Agilent, Santa Clara, CA). Samples with RNA integrity numbers (RINs) of 8 or greater were subjected to Illumina TruSeq mRNA Sample Preparation v2 kit (Catalog #s RS-122-2001, RS-122-2002), and 1-3g of total RNA was purified to mRNA using polyA purification. The mRNA was fragmented via chemical fragmentation and reverse transcribed into cDNA using reverse transcriptase and random primers. The 3' ends of the cDNA were adenylated, and 6-nucleotide-barcoded adapters ligated. The products were purified and enriched by PCR to generate the final cDNA library. Final libraries were checked for quality and quantity by TapeStation (Agilent) and qPCR using Kapa's library quantification kit for Illumina Sequencing platforms (Kapa Biosystems, cat# KK4835). They were clustered on the cBot (Illumina) and 4 samples per lane were sequenced on a 50-cycle single end run in a HiSeq 2500 (Illumina) by the University of Michigan DNA Sequencing and Bioinformatics Cores. The Tuxedo Suite software package was used for alignment, differential expression analysis, and post-analysis diagnostics (Trapnell et al., 2013). Cufflinks/CuffDiff (<http://coletrapnell-lab.github.io/cufflinks/>) (Trapnell et al., 2012) was used for quantitation, normalization, and determination of differential expression using University of California Santa Cruz (Santa Cruz, CA) mm10.fa as the reference genome sequence ([http:// genome.ucsc.edu/](http://genome.ucsc.edu/)). Hierarchical cluster analysis was conducted to assemble genes with similar expression patterns across groups using Cluster 3.0 software. After normalization of the expression of each gene by log<sub>2</sub> transformation, gene clustering was performed with average linkage method with Euclidean distance. The hierarchical cluster heatmap was organized by Java TreeView software. DEGs in pairwise comparisons among groups were determined using Cufflinks/Cuffdiff analysis, with thresholds for differential expression set to fold change (fc)>1.5 or <0.66 and a false discovery rate (q value) of ≤ 0.05. The Gene List analysis and Visualization (VLAD) v1.8.0 was used to define the enriched biological processes (BP), cellular component (CC) and molecular function (MF) of DEGs. For pathway analysis, the Kyoto Encyclopedia of Genes and Genomes (KEGG) pathway database using DAVID v6.8 was used to reveal physical and/or functional interactions among the genes. Gene ontology (GO) and pathway terms showing unadjusted p-values < 0.05 were selected. STRING online database (<http://string-db.org>) was used to assess protein-protein interaction (PPI) and Cytoscape software (<http://www.cytoscape.org/>) was employed to visualize PPI network interaction of common DEGs.

### **Mapping of phosphoSTAT binding sites**

The potential pSTAT3/STAT5 binding sites across the promoter region (1500bp upstream and 500bp downstream of the transcription start site) of the core genes were scanned by C<sup>++</sup>DER software. JASPAR2020\_CORE\_vertbrates clustering was used as the transcription factor position frequency matrix. Deficit threshold was defined as 0.15. One thousand genes with close to zero-fold change between WT and Lep<sup>ob</sup> from PMv TRAP-seq and Arc TRAP-seq, respectively, were used as the background gene list to identify significantly over-represented

STAT3/STAT5-targeting core genes in PMv and Arc, respectively. Fisher's exact test was used and gene coverage p-value < 0.05 was considered significant.

### **Analysis of Overlapping DEGs in all three RNAseq Assays**

All analyses were generated in R (v3.6.1) language for statistical computing (<https://www.R-project.org/>). Independent RNA-seq data (MBHp, TRAPseq, and PP vs Di CuffDiff results) and DAVID enrichments were used as input files (Huang da et al., 2009a, b; Trapnell et al., 2012). To determine shared DAVID functional enrichments between comparisons from different projects, shared DEGs and identity of all measured genes across the comparisons were first determined. Group comparisons:

Group 1: WT\_v\_Ob\_Saline\_DE.xlsx (MBHp), PMV.diestrus\_v\_PMV.ob\_saline.xlsx (TRAPseq), PMV.Adult\_v\_PMV.Pre.xlsx (PP vs Di);

Group 2: WT\_v\_Ob\_Saline\_DE.xlsx (MBHp), ARC.diestrus\_v\_ARC.ob\_saline.xlsx (TRAPseq), ARC.Adult\_v\_ARC.Pre.xlsx (PP vs Di);

Group 3: Supp Table 1 DEGs (MBHp), Supp Table 4 PMV DEGs (TRAPseq), PMV.Adult\_v\_PMV.Pre.xlsx (PP vs Di);

Group 4: Supp Table 1 DEGs (MBHp), Supp Table 6 Arc DEGs (TRAPseq), ARC.Adult\_v\_ARC.Pre.xlsx (PP vs Di)

Shared DEGs and all measured genes between comparison sets were converted from gene symbols to ENSEMBL ids and used as query sets and background sets, respectively, for DAVID enrichments using R package RDAVIDWebService (v3.10) (Fresno and Fernandez, 2013). Enrichments were repeated with rDEGs as query sets for Group 3 and Group 4. The background sets generated for Group 1 (PMv) and Group 2 (Arc) were used for DEGs and rDEG DAVID enrichments for Group 3 (PMv) and Group 4 (Arc), matched by cell-type.

### **Quantitative PCR (qPCR) validation of RNA-sequencing data**

To validate the RNAseq data, PMv and Arc samples obtained by micro punches were evaluated. Tissue was homogenized in Qiazol reagent (Qiagen), and total RNA was isolated using an RNA extraction kit (miRNeasy, Qiagen). Total RNA (200 ng) was used to synthesize cDNA using SuperScript II reverse transcriptase and random primers (Invitrogen) according to the manufacturer's protocol. Gene expression analyses were performed by qPCR using a CFX-384 Bio-Rad Real-Time PCR detection system (SYBR Green reaction). The mRNA levels were normalized to the *18s* ribosomal RNA reference gene, and changes related to the control levels (WT, diestrous females) were determined using  $2^{-\Delta\Delta Ct}$  method. We initially evaluated the variation of *18s* Ct values across samples and experiment groups and no difference was observed (all groups showed Ct values ranging from 12.8 to 13.4) indicating the *18s* was an adequate reference gene. Primers for targeted and reference genes are listed in Table S5.

### **Immunofluorescence**

A group of PP and Di mice were intracardially perfused with 10% formalin, and brains were prepared for histological examination. Hypothalamic sections of PP and Di females were labeled with sheep anti-VWF (1:1,000 Abcam, cat#ab11713) and/or rabbit anti-Laminin (1:1000 Novus, cat#NB300-144). According to the manufacturers, the laminin antibody is pan-specific and



reacts with all laminin isoforms tested: Laminin-1 (alpha-1, beta-1, and gamma-1) and Laminin-2 (alpha-2, beta-1, and gamma-1). Following overnight incubation at room temperature, tissue was incubated in secondary conjugated to AF488 or AF594 (Invitrogen) for 1h. Another series of hypothalamic sections from PP and Di mice were also incubated in rabbit anti-CART peptide (1:10,000 Phoenix, cat#H-003-62) and processed for immunoperoxidase using DAB and silver enhancement.

## QUANTIFICATION AND STATISTICAL ANALYSIS

Data other than RNAseq are reported as mean  $\pm$  standard error of the mean (SEM) and were analyzed using the GraphPad Prism 7 software. Statistical analyses of RT-qPCR data and changes in body weight and food intake of Lep<sup>ob</sup> mice before and after saline or leptin treatment were done by one-way ANOVA followed by Tukey's test. Quantification of CART-ir fiber density was performed in one section and one side of the Arc (n=3/group) at the tuberal level (image 67, Allen Mouse Brain Atlas). Fiber density was quantified by integrated optical density using fixed illumination, background normalization and gray scale in Image J (NIH). Quantification of colocalization between GFP- and Laminin-ir was performed in one section and one side of the PMv (n=4-5, Image 76, Allen Mouse Brain Atlas). F test to compare variances and one-way ANOVA followed by Tukey's test were used. Significance was set at  $p < 0.05$ .

## References

- Allison, M.B., Pan, W., MacKenzie, A., Patterson, C., Shah, K., Barnes, T., Cheng, W., Rupp, A., Olson, D.P., and Myers, M.G., Jr. (2018). Defining the Transcriptional Targets of Leptin Reveals a Role for Atf3 in Leptin Action. *Diabetes* 67, 1093-1104.
- Allison, M.B., Patterson, C.M., Krashes, M.J., Lowell, B.B., Myers, M.G., Jr., and Olson, D.P. (2015). TRAP-seq defines markers for novel populations of hypothalamic and brainstem LepRb neurons. *Mol Metab* 4, 299-309.
- Burger, L.L., Vanacker, C., Phumsatitpong, C., Wagenmaker, E.R., Wang, L., Olson, D.P., and Moenter, S.M. (2018). Identification of Genes Enriched in GnRH Neurons by Translating Ribosome Affinity Purification and RNAseq in Mice. *Endocrinology* 159, 1922-1940.
- Fresno, C., and Fernandez, E.A. (2013). RDAVIDWebService: a versatile R interface to DAVID. *Bioinformatics* 29, 2810-2811.
- Heiman, M., Kulicke, R., Fenster, R.J., Greengard, P., and Heintz, N. (2014). Cell type-specific mRNA purification by translating ribosome affinity purification (TRAP). *Nature Protocols* 9, 1282.
- Huang da, W., Sherman, B.T., and Lempicki, R.A. (2009a). Bioinformatics enrichment tools: paths toward the comprehensive functional analysis of large gene lists. *Nucleic Acids Res* 37, 1-13.
- Huang da, W., Sherman, B.T., and Lempicki, R.A. (2009b). Systematic and integrative analysis of large gene lists using DAVID bioinformatics resources. *Nat Protoc* 4, 44-57.

Krashes, M.J., Shah, B.P., Madara, J.C., Olson, D.P., Strohlic, D.E., Garfield, A.S., Vong, L., Pei, H., Watabe-Uchida, M., Uchida, N., *et al.* (2014). An excitatory paraventricular nucleus to AgRP neuron circuit that drives hunger. *Nature* 507, 238-242.

Leshan, R.L., Bjornholm, M., Munzberg, H., and Myers, M.G., Jr. (2006). Leptin receptor signaling and action in the central nervous system. *Obesity (Silver Spring)* 14 Suppl 5, 208S-212S.

Trapnell, C., Hendrickson, D.G., Sauvageau, M., Goff, L., Rinn, J.L., and Pachter, L. (2013). Differential analysis of gene regulation at transcript resolution with RNA-seq. *Nat Biotechnol* 31, 46-53.

Trapnell, C., Roberts, A., Goff, L., Pertea, G., Kim, D., Kelley, D.R., Pimentel, H., Salzberg, S.L., Rinn, J.L., and Pachter, L. (2012). Differential gene and transcript expression analysis of RNA-seq experiments with TopHat and Cufflinks. *Nat Protoc* 7, 562-578.
